# Supplementary material for: Genotypic Distribution and the Epidemiology of Multidrug Resistant Tuberculosis in Upper Northern Thailand
Source: MDPI journal article supplement (doi:10.3390/antibiotics11121733), 2022-12-01
Supplement: s1 [file s1]

**Table S1.** Genotypes and sources of 51 multidrug-resistant *Mycobacterium tuberculosis* isolates.

| Sample Code<br>(n = 51) | Mutation    |             |                      | Province   |
|-------------------------|-------------|-------------|----------------------|------------|
|                         | <i>rpoB</i> | <i>katG</i> | <i>inhA Promoter</i> |            |
| MDR1                    | S531L       | No mutation | No mutation          | Chiang Mai |
| MDR2                    | S531L       | No mutation | No mutation          | Chiang Mai |
| MDR3                    | S531L       | No mutation | No mutation          | Chiang Mai |
| MDR4                    | S531L       | No mutation | No mutation          | Chiang Rai |
| MDR5                    | S531L       | No mutation | No mutation          | Chiang Rai |
| MDR6                    | S531L       | S315T       | No mutation          | Lampang    |
| MDR7                    | S531L       | S315T       | No mutation          | Phayao     |
| MDR8                    | S531L       | S315T       | No mutation          | Nan        |
| MDR9                    | S531L       | S315T       | No mutation          | Nan        |
| MDR10                   | S531L       | S315T       | No mutation          | Phrae      |
| MDR11                   | S531L       | S315T       | No mutation          | Chiang Rai |
| MDR12                   | S531L       | S315T       | No mutation          | Chiang Rai |
| MDR13                   | S531L       | S315T       | No mutation          | Chiang Rai |
| MDR14                   | S531L       | S315T       | No mutation          | Chiang Rai |
| MDR15                   | S531L       | S315T       | No mutation          | Chiang Rai |
| MDR16                   | S531L       | S315T       | No mutation          | Chiang Mai |
| MDR17                   | S531L       | No mutation | -15                  | Nan        |
| MDR18                   | S531L       | No mutation | -15                  | Chiang Mai |
| MDR19                   | S531L       | No mutation | -15                  | Chiang Rai |
| MDR20                   | S531L       | No mutation | -15                  | Chiang Rai |
| MDR21                   | S531L       | No mutation | -15                  | Chiang Rai |
| MDR22                   | S531L       | No mutation | -15                  | Chiang Rai |
| MDR23                   | S531L       | No mutation | -17                  | Chiang Mai |
| MDR24                   | S531L       | S315T       | -8                   | Lamphun    |
| MDR25                   | S531L       | S315T       | -8                   | Lamphun    |
| MDR26                   | S531L       | S315T       | -8                   | Lamphun    |
| MDR27                   | H526Y       | No mutation | No mutation          | Chiang Mai |
| MDR28                   | H526Y       | No mutation | No mutation          | Chiang Mai |
| MDR29                   | H526Y       | No mutation | No mutation          | Chiang Rai |
| MDR30                   | H526Y       | S315T       | No mutation          | Chiang Mai |
| MDR31                   | H526Y       | S315T       | No mutation          | Lampang    |
| MDR32                   | H526Y       | S315T       | No mutation          | Chiang Mai |
| MDR33                   | H526Y       | S315T       | No mutation          | Lampang    |
| MDR34                   | H526Y       | S315T       | No mutation          | Lampang    |
| MDR35                   | H526Y       | S315T       | No mutation          | Chiang Mai |
| MDR36                   | H526Y       | No mutation | -15                  | Lampang    |
| MDR37                   | H526D       | S315T       | No mutation          | Lampang    |
| MDR38                   | H526D       | S315T       | No mutation          | Phrae      |
| MDR39                   | H526D       | S315T       | No mutation          | Chiang Rai |
| MDR40                   | H526D       | S315T       | No mutation          | Chiang Rai |
| MDR41                   | H526D       | S315T       | No mutation          | Chiang Rai |
| MDR42                   | H526D       | No mutation | -15                  | Phrae      |
| MDR43                   | D516V       | S315T       | No mutation          | Chiang Rai |
| MDR44                   | D516V       | S315T       | No mutation          | Phayao     |
| MDR45                   | D516V       | No mutation | -9                   | Chiang Mai |
| MDR46                   | S522L       | S315T       | -17                  | Chiang Mai |
| MDR47                   | H526R       | S315T       | -15                  | Lampang    |
| MDR48                   | Q513P       | No mutation | No mutation          | Chiang Rai |
| MDR49                   | H526C       | S315T       | No mutation          | Chiang Rai |
| MDR50                   | H526P       | S315T       | No mutation          | Chiang Rai |
| MDR51                   | No mutation | S315T       | No mutation          | Lampang    |
